# Supplementary material for: Heterogeneous impact of alcohol consumption according to treatment method on survival in head and neck cancer: A prospective study
Source: PubMed Central journal article supplement — Cancer Sci. 2017 Jan 26;108(1):91–100. doi: 10.1111/cas.13115 (PMC5276823; doi:10.1111/cas.13115), 2017-01-26
Supplement: CAS-108-91-s001.pdf [file CAS-108-91-s001.pdf]

**Figure. S1.** Kaplan-Meier survival curve of onset of metachronous cancer

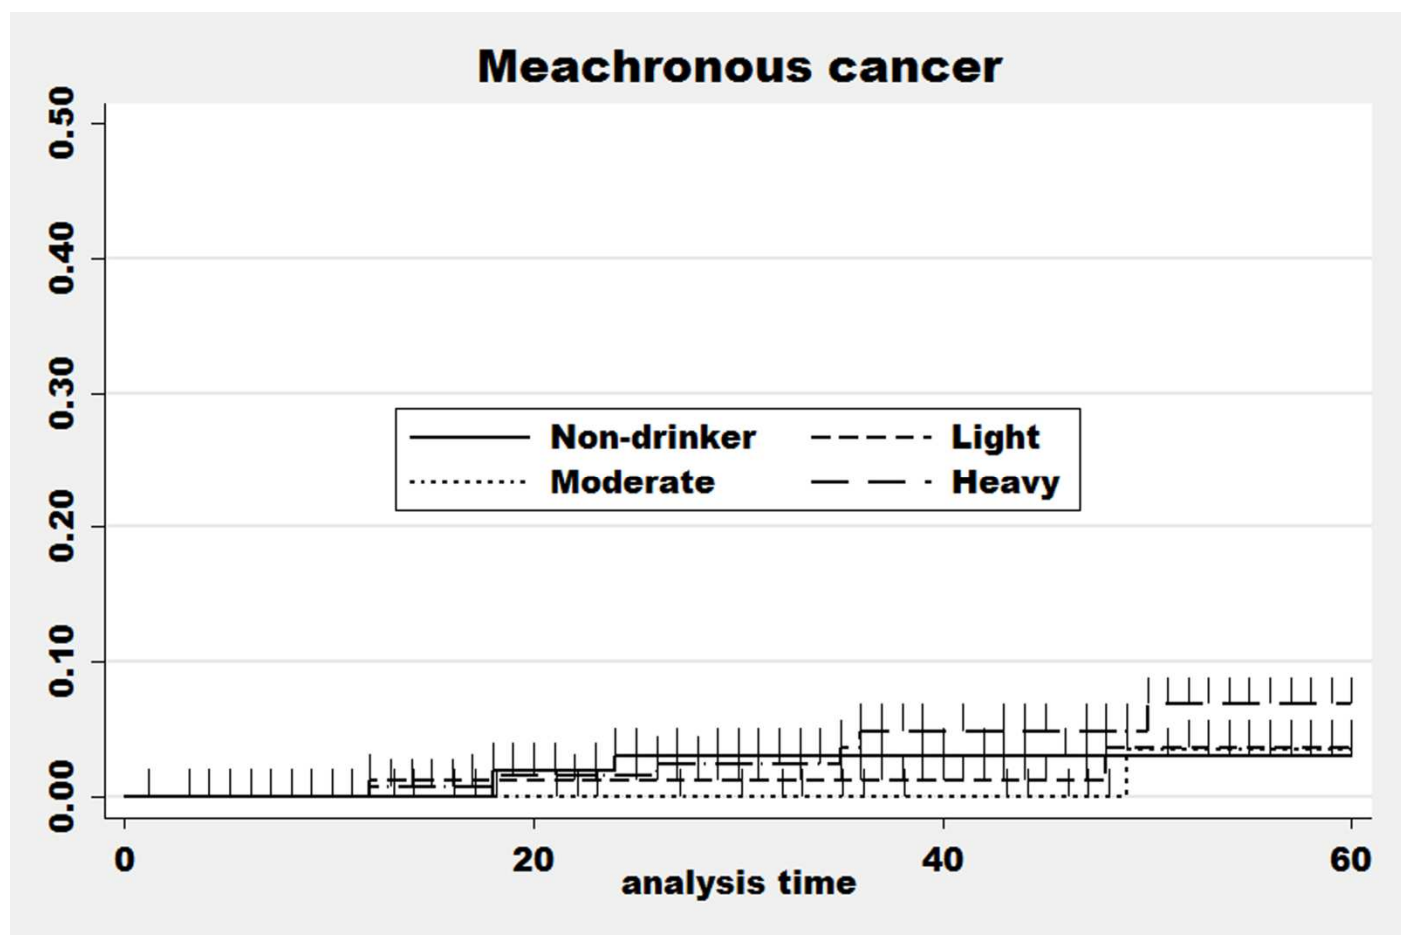

A suggestive association with alcohol consumption was observed in crude analysis with an unadjusted HR of 2.98 (0.82-10.70) for heavy drinkers, but this was not statistically significant in multivariable analysis with an HR of 2.54 (0.42-15.30).
