# Supplementary material for: Heterogeneous impact of alcohol consumption according to treatment method on survival in head and neck cancer: A prospective study
Source: PubMed Central journal article supplement — Cancer Sci. 2017 Jan 26;108(1):91–100. doi: 10.1111/cas.13115 (PMC5276823; doi:10.1111/cas.13115), 2017-01-26
Supplement: CAS-108-91-s002.pdf [file CAS-108-91-s002.pdf]

**Figure. S2:** Subgroup analysis of impact of drinking categories on OS.

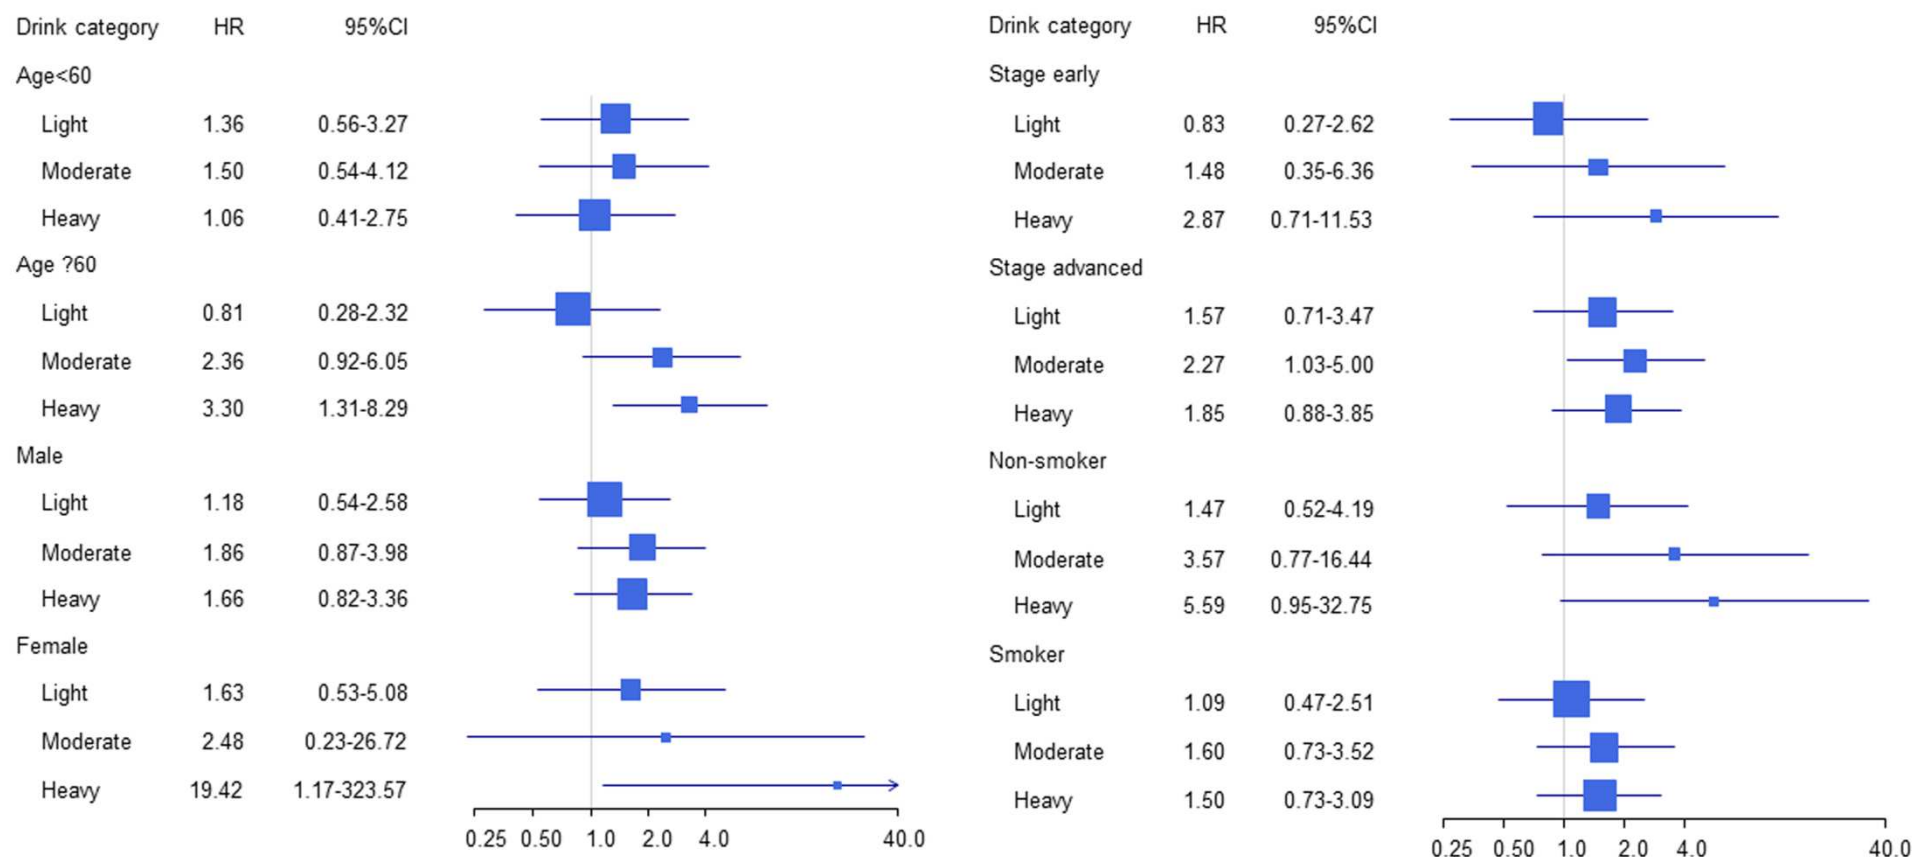

Compared with non-drinkers, the survival of heavy and moderate drinkers was poor in all subgroups, except in the strata of age less than 60.
