# Supplementary material for: Heterogeneous impact of alcohol consumption according to treatment method on survival in head and neck cancer: A prospective study
Source: PubMed Central journal article supplement — Cancer Sci. 2017 Jan 26;108(1):91–100. doi: 10.1111/cas.13115 (PMC5276823; doi:10.1111/cas.13115), 2017-01-26
Supplement: CAS-108-91-s004.pdf [file CAS-108-91-s004.pdf]

**Figure. S4.** Kaplan–Meier survival curves of OS (A), DSS (B), DFS (C) for laryngopharyngeal cancer patients.

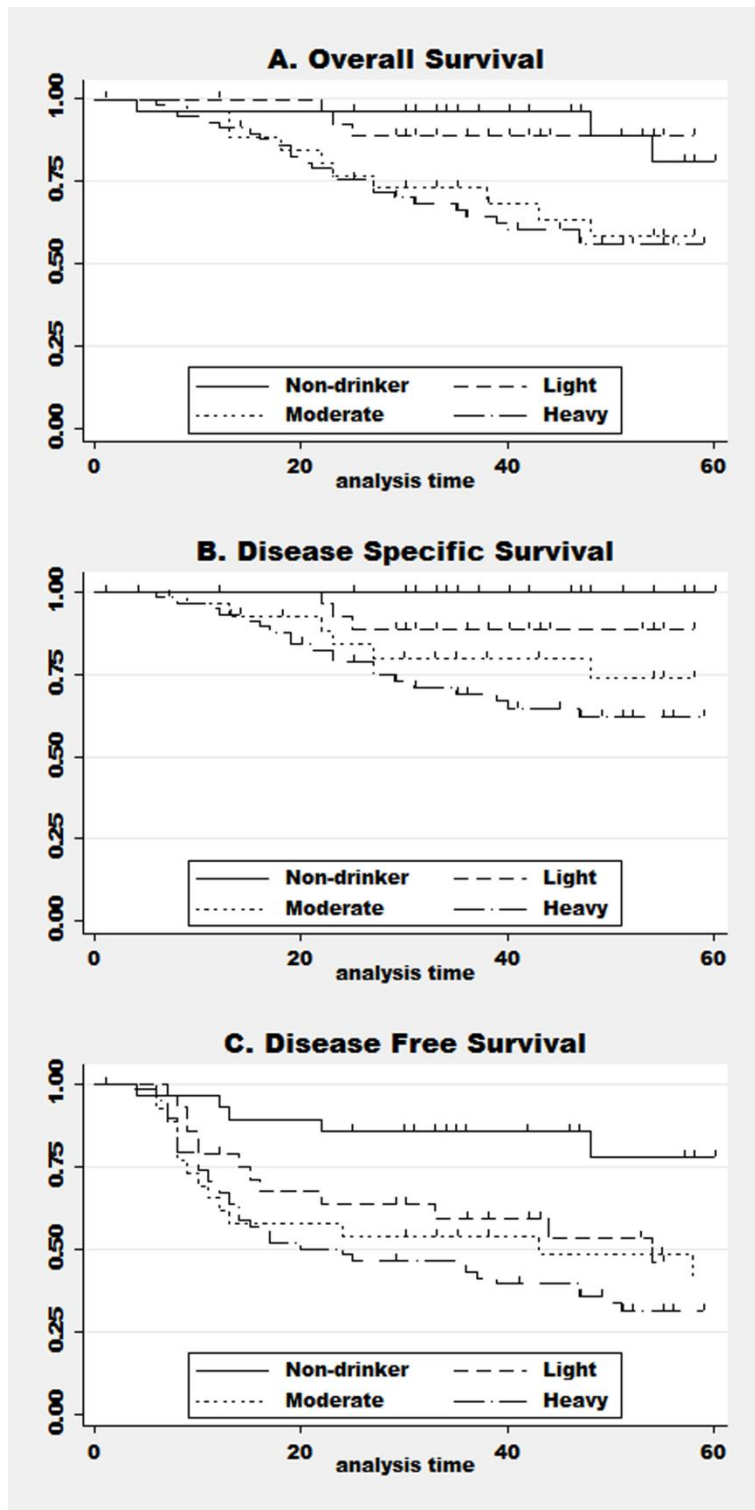

(A) OS: a significant dose-response relationship was observed (trend  $p = 0.034$ ), and heavy ( $n=59$ ) and moderate ( $n=26$ ) alcohol consumption were associated with poorer survival than in non-drinker groups (HR:3.11, 95%CI:0.76-12.69,  $p=0.113$ , HR:2.94 95%CI: 0.69-12.51,  $p=0.145$ ).

(B) DSS: a significant dose-response relationship was observed (trend  $p = 0.009$ ).

(C) DFS: a significant dose-response relationship was observed (trend  $p = 0.004$ ), and patients with moderate and heavy alcohol consumption showed a significant association with poorer prognosis compared with the non-drinker group (HR: 4.37, 95%CI 1.37-13.93; and HR: 5.03, 95%CI 1.64-15.40, respectively).
