# Supplementary material for: Heterogeneous impact of alcohol consumption according to treatment method on survival in head and neck cancer: A prospective study
Source: PubMed Central journal article supplement — Cancer Sci. 2017 Jan 26;108(1):91–100. doi: 10.1111/cas.13115 (PMC5276823; doi:10.1111/cas.13115), 2017-01-26
Supplement: CAS-108-91-s005.pdf [file CAS-108-91-s005.pdf]

Supplement TableS1. Interaction between alcohol consumption and potential confounder on OS.

| Potential confounder |          |                       | N (%)    | HR (95%CI) <sup>‡</sup> | p value | P for inteeraction |
|----------------------|----------|-----------------------|----------|-------------------------|---------|--------------------|
| Age                  |          |                       |          |                         |         |                    |
| Age                  | Age >60  | Non-drinker           | 53 (27)  | 1 (Reference)           |         | 0.196              |
|                      |          | Light <sup>†</sup>    | 48 (25)  | 1.36 (0.56-3.27)        | 0.497   |                    |
|                      |          | Moderate <sup>†</sup> | 29 (15)  | 1.50 (0.54-4.12)        | 0.433   |                    |
|                      |          | Heavy <sup>†</sup>    | 65 (33)  | 1.06 (0.41-2.75)        | 0.904   |                    |
|                      | Age ≥60  | Non-drinker           | 60 (26)  | 1 (Reference)           |         |                    |
|                      |          | Light <sup>†</sup>    | 45 (19)  | 0.81 (0.28-2.32)        | 0.688   |                    |
|                      |          | Moderate <sup>†</sup> | 45 (19)  | 2.36 (0.92-6.05)        | 0.074   |                    |
|                      |          | Heavy <sup>†</sup>    | 82 (35)  | 3.30 (1.31-8.29)        | 0.011   |                    |
| Sex                  |          |                       |          |                         |         |                    |
| Sex                  | Male     | Non-drinker           | 54 (16)  | 1 (Reference)           |         | 0.439              |
|                      |          | Light <sup>†</sup>    | 72 (22)  | 1.18 (0.54-2.58)        | 0.682   |                    |
|                      |          | Moderate <sup>†</sup> | 67 (20)  | 1.86 (0.87-3.98)        | 0.107   |                    |
|                      |          | Heavy <sup>†</sup>    | 141 (42) | 1.66 (0.82-3.36)        | 0.156   |                    |
|                      | Female   | Non-drinker           | 59 (63)  | 1 (Reference)           |         |                    |
|                      |          | Light <sup>†</sup>    | 21 (22)  | 1.63 (0.53-5.08)        | 0.397   |                    |
|                      |          | Moderate <sup>†</sup> | 7 (8)    | 2.48 (0.23-26.72)       | 0.454   |                    |
|                      |          | Heavy <sup>†</sup>    | 6 (6)    | 19.42 (1.17-329.57)     | 0.039   |                    |
| Stage                |          |                       |          |                         |         |                    |
| Stage                | Early    | Non-drinker           | 51 (30)  | 1 (Reference)           |         | 0.999              |
|                      |          | Light <sup>†</sup>    | 46 (26)  | 0.83 (0.27-2.62)        | 0.757   |                    |
|                      |          | Moderate <sup>†</sup> | 26 (15)  | 1.48 (0.35-11.53)       | 0.594   |                    |
|                      |          | Heavy <sup>†</sup>    | 48 (28)  | 2.87 (0.71-11.53)       | 0.138   |                    |
|                      | Advanced | Non-drinker           | 62 (24)  | 1 (Reference)           |         |                    |
|                      |          | Light <sup>†</sup>    | 47 (18)  | 1.58 (0.71-3.47)        | 0.271   |                    |
|                      |          | Moderate <sup>†</sup> | 49 (19)  | 2.27 (1.03-5.00)        | 0.042   |                    |
|                      |          | Heavy <sup>†</sup>    | 99 (39)  | 1.85 (0.88-3.85)        | 0.103   |                    |
| Smoking status       |          |                       |          |                         |         |                    |
| Smoking status       | Never    | Non-drinker           | 63 (57)  | 1 (Reference)           |         | 0.103              |
|                      |          | Light <sup>†</sup>    | 30 (28)  | 1.47 (0.52-4.19)        | 0.468   |                    |
|                      |          | Moderate <sup>†</sup> | 8 (7)    | 3.57 (0.77-16.44)       | 0.103   |                    |
|                      |          | Heavy <sup>†</sup>    | 8 (7)    | 5.59 (0.95-32.75)       | 0.056   |                    |
|                      | Ever     | Non-drinker           | 50 (16)  | 1 (Reference)           |         |                    |
|                      |          | Light <sup>†</sup>    | 63 (20)  | 1.09 (0.47-2.51)        | 0.837   |                    |
|                      |          | Moderate <sup>†</sup> | 66 (20)  | 1.60 (0.63-3.52)        | 0.245   |                    |
|                      |          | Heavy <sup>†</sup>    | 139 (43) | 1.50 (0.73-3.09)        | 0.270   |                    |

<sup>†</sup> light group 0 < <23g alcohol /day. Moderate group 23g ≤ <46g alcohol /day. Heavy group 46g ≤ alcohol /day.

<sup>‡</sup> adjusted by sex age PS UICCstage primarysite smoker energy synchronous, metachronous SPC definitive therapy
